# Supplementary material for: Efficient direct lignin fuel cells enabled by hierarchical nickel–iron phosphide nanosheets as an anode catalyst
Source: Royal Society of Chemistry journal article supplement (doi:10.1039/d2se00930g), 2022-01-01
Supplement: d2se00930g1.pdf [file d2se00930g1.pdf]

## Supporting Information

### Efficient Direct Lignin Fuel Cell Enabled by Hierarchical Nickel-Iron Phosphide Nanosheets as Anode Catalyst†

Fei Liu,†<sup>a</sup> A Lusi,†<sup>b</sup> Harish Radhakrishnan,<sup>b</sup> Hengzhou Liu,<sup>c</sup> Wenzhen Li,<sup>c</sup> Hantang Qin,<sup>d</sup> Shan Jiang,<sup>a</sup> Xianglan Bai,<sup>b</sup> and Hu Shan\*<sup>b</sup>

a Department of Materials Science and Engineering, Iowa State University, Ames, IA, 50011, United States.

b Department of Mechanical Engineering, Iowa State University, Ames, IA, 50011, United States.

c Department of Chemical and Biological Engineering, Iowa State University, Ames, IA, 50011, United States.

d Department of Industrial and Manufacturing Systems Engineering, Iowa State University, Ames, IA, 50011, United States.

† These authors contribute equally.

\*Email: [shanhu@iastate.edu](mailto:shanhu@iastate.edu)

Table S1. Ultimate analysis, proximate, and molecular weight distributions of lignin samples.

|                           | ADM lignin | SKL lignin |
|---------------------------|------------|------------|
| N [%]                     | 1.64       | 0.67       |
| C [%]                     | 60.34      | 61.79      |
| H [%]                     | 4.65       | 4.94       |
| S [%]                     | 0.28       | 1.61       |
| O [%]                     | 33.09      | 30.99      |
| Moisture [wt%]            | 3.9        | 2.3        |
| Volatile [wt%]            | 61.1       | 55.1       |
| Fixed Carbon [wt%]        | 27.2       | 38.8       |
| Ash [wt%]                 | 5.9        | 2.6        |
| Number Average $M_n$ [Da] | 1296       | 1215       |
| Weight Average $M_w$ [Da] | 6330       | 5505       |
| Polydispersity PD         | 4.89       | 4.53       |

Table S2. ICP-OES data for NiFeP catalysts.

| Ni/Fe content in the precursor solution |        | Ni/Fe content in the catalyst |        |
|-----------------------------------------|--------|-------------------------------|--------|
| Ni (%)                                  | Fe (%) | Ni (%)                        | Fe (%) |

|     |     |       |       |
|-----|-----|-------|-------|
| 90% | 10% | 91.2% | 8.8%  |
| 70% | 30% | 71.9% | 28.1% |
| 50% | 50% | 51.2% | 48.8% |

Table S3. A comparison of different fuel cells using lignin or lignocellulosic biomass as feedstock.

| Fuel Cell Type | Fuels                           | Anode catalyst                                                                               | Heterogeneous or Homogeneous catalysts | Power density (mW cm <sup>-2</sup> ) | Ref.      |
|----------------|---------------------------------|----------------------------------------------------------------------------------------------|----------------------------------------|--------------------------------------|-----------|
| MFC            | Rice straw                      | Bacteria                                                                                     | -                                      | 0.0145                               | [1]       |
| MFC            | Rice straw                      | Bacteria                                                                                     | -                                      | 0.019                                | [2]       |
| MFC            | Corn stover                     | Bacteria                                                                                     | -                                      | 0.0331                               | [3]       |
| AFC            | Barley straw                    | Methyl viologen                                                                              | Homogeneous                            | 0.04                                 | [4]       |
| LFFC           | Wheat straw                     | H <sub>3</sub> PMo <sub>12</sub> O <sub>40</sub>                                             | Homogeneous                            | 10.8                                 | [5]       |
| LFFC           | Wheat straw                     | H <sub>4</sub> PMo <sub>11</sub> VO <sub>40</sub>                                            | Homogeneous                            | 12.4                                 | [6]       |
| LFFC           | Wheat straw                     | H <sub>3</sub> PMo <sub>12</sub> O <sub>40</sub>                                             | Homogeneous                            | 11                                   | [6]       |
| LFFC           | Corn stover                     |                                                                                              |                                        |                                      |           |
| LFFC           | Corn cob                        | H <sub>3</sub> PMo <sub>12</sub> O <sub>40</sub>                                             | Homogeneous                            | 28 - 35                              | [7]       |
| LFFC           | Peanut shell                    |                                                                                              |                                        |                                      |           |
| LFFC           | Wheat straw                     | Methylene blue                                                                               | Homogeneous                            | 12.3 (acid)<br>41.8 (alkaline)       | [8]       |
| LFFC           | Kraft lignin                    | H <sub>3</sub> PMo <sub>12</sub> O <sub>40</sub>                                             | Homogeneous                            | 5                                    | [9]       |
| LFFC           | Corn stover                     | K <sub>3</sub> Fe(CN) <sub>6</sub>                                                           | Homogeneous                            | 200                                  | [10]      |
| LFFC           | alkaline lignin                 |                                                                                              |                                        |                                      |           |
| LFFC           | kraft black                     |                                                                                              |                                        |                                      |           |
| LFFC           | liquor and spent sulfite liquor | Pt, Ni                                                                                       | Heterogeneous                          | 1.4                                  | [11]      |
| LFFC           | Lignin-sulfonic acid            | TiO <sub>2</sub> /Co<br>TiO <sub>2</sub> /Cu<br>TiO <sub>2</sub> /Ni<br>TiO <sub>2</sub> /Os | Heterogeneous                          | 0.061                                | [12]      |
| LFFC           | Corn stover lignin              | NiFeP                                                                                        | Heterogeneous                          | 24                                   | This work |

Table S4. FTIR peaks and corresponding functional groups of ADM lignin before and after fuel cell reaction.

| Wavenumber [cm <sup>-1</sup> ] | Structure and functional group                      |
|--------------------------------|-----------------------------------------------------|
| 3362                           | Hydroxyl group in phenolic and aliphatic structures |

|                  |                                                                                    |
|------------------|------------------------------------------------------------------------------------|
| 2945             | CH stretching in aromatic methoxy groups and methylene group side chains           |
| 2917, 2848, 2833 | CH stretching in aliphatic methylene group                                         |
| 1718, 1707       | Unconjugated Carbonyl/carboxyl stretching                                          |
| 1689             | Conjugated carbonyl/carboxyl stretching                                            |
| 1605, 1515, 1424 | Aromatic skeletal vibrations                                                       |
| 1462             | C-H deformation combined with aromatic ring vibration                              |
| 1376             | Phenolic OH and aliphatic C-H in methyl groups                                     |
| 1329             | Syringyl (S) ring and guaiacyl (G) ring condensed                                  |
| 1272             | G ring and C=O stretching                                                          |
| 1220             | Stretching of C-C, C-O and C=O                                                     |
| 1140             | C-H in-plane deformation of G units                                                |
| 1120             | C-H in-plane deformation of S units                                                |
| 1084, 1031       | C-O deformation in alcohols and aliphatic ethers, and the unconjugated C=O stretch |
| 1035             | Aromatic C-H deformation                                                           |
| 854, 817         | C-H out-of-plane vibrations in position 2, 5 and 6 of G units                      |
| 832              | H units in corn stover; C-H out-of-plane vibration in position 2 and 6 of S units  |

---

\*Peaks are identified based on the previous studies.<sup>[13-15]</sup>

Table S5. Proximate analysis of acid washed ADM lignin.

|                           | <b>Acid washed ADM lignin</b> |
|---------------------------|-------------------------------|
| <b>Moisture [wt%]</b>     | <b>2.9</b>                    |
| <b>Volatile [wt%]</b>     | <b>60.6</b>                   |
| <b>Fixed Carbon [wt%]</b> | <b>33.4</b>                   |
| <b>Ash [wt%]</b>          | <b>3.0</b>                    |

Table S6. ICP-OES results of ADM lignin and acid washed ADM lignin.

|                 | <b>ADM lignin</b> | <b>Acid washed ADM lignin</b> |
|-----------------|-------------------|-------------------------------|
| <b>Al [ppm]</b> | 1314              | 1244                          |

|                 |      |      |
|-----------------|------|------|
| <b>Ca [ppm]</b> | 1918 | 211  |
| <b>Cu [ppm]</b> | 2    | -24  |
| <b>Fe [ppm]</b> | 1043 | 785  |
| <b>Mg [ppm]</b> | 601  | 223  |
| <b>Mn [ppm]</b> | 80   | 45   |
| <b>P [ppm]</b>  | 492  | 93   |
| <b>Zn [ppm]</b> | -55  | -73  |
| <b>Na [ppm]</b> | 1603 | 1458 |
| <b>K [ppm]</b>  | 4086 | 262  |

Table S7. Molecular weight distribution of acid washed ADM lignin.

| <b>Acid washed ADM lignin</b> |      |
|-------------------------------|------|
| <b>Number Average Mn [Da]</b> | 1381 |
| <b>Weight Average Mw [Da]</b> | 6482 |
| <b>Polydispersity PD</b>      | 4.70 |

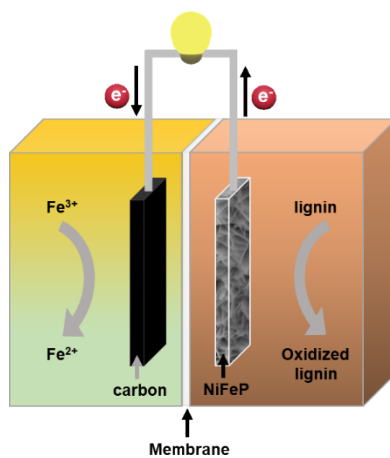

Figure S1. Schematic diagram of the direct lignin fuel cell.

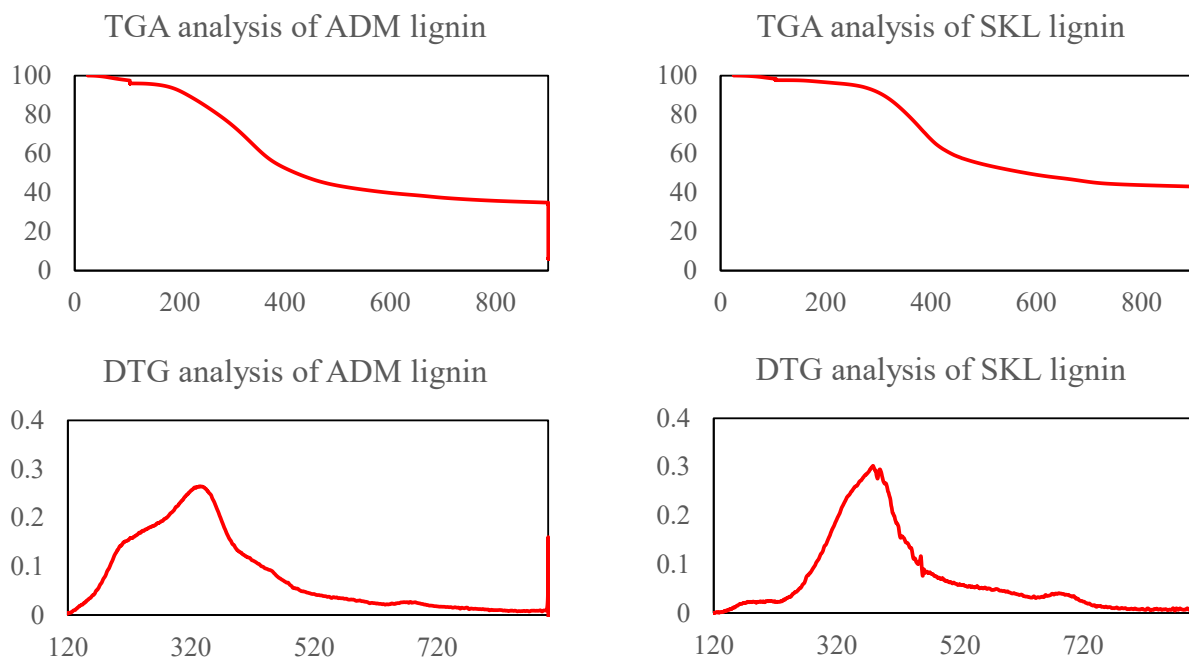

Figure S2. TGA/DTG analysis of lignin samples.

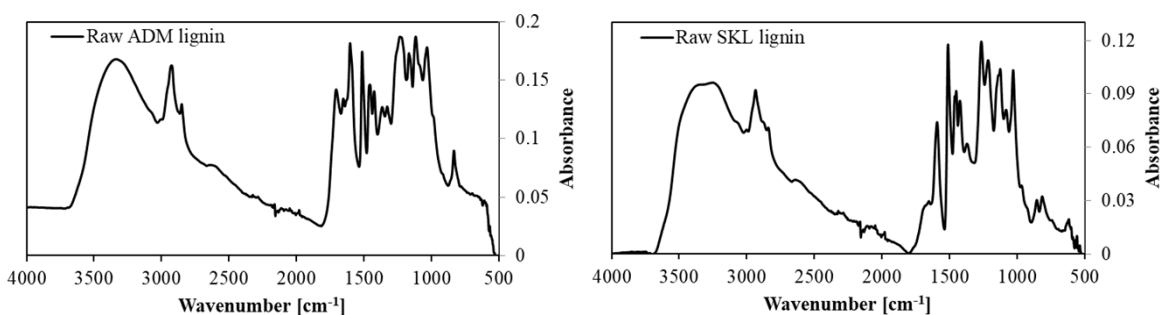

Figure S3. Fourier transform infrared spectroscopy (FTIR) analysis of lignin samples.

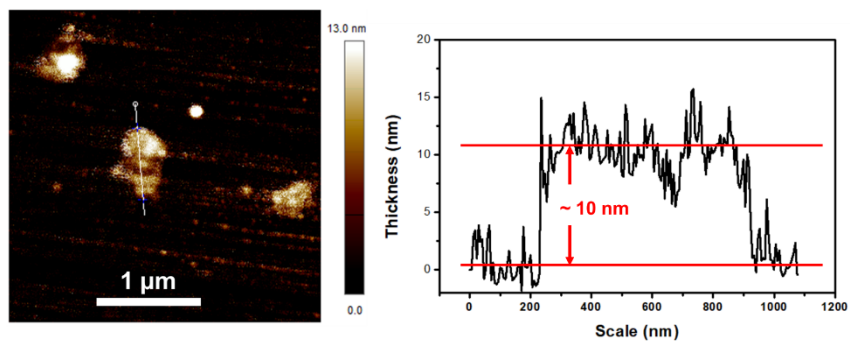

Figure S4. An atomic force microscopy image of NiFeP nanosheets and corresponding height profile of a typical nanosheet.

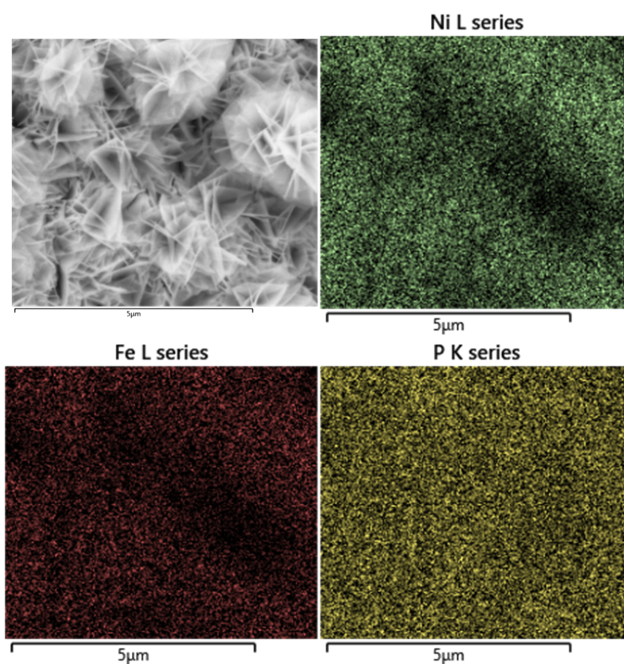

Figure S5. SEM and EDS elemental mapping images of NiFeP.

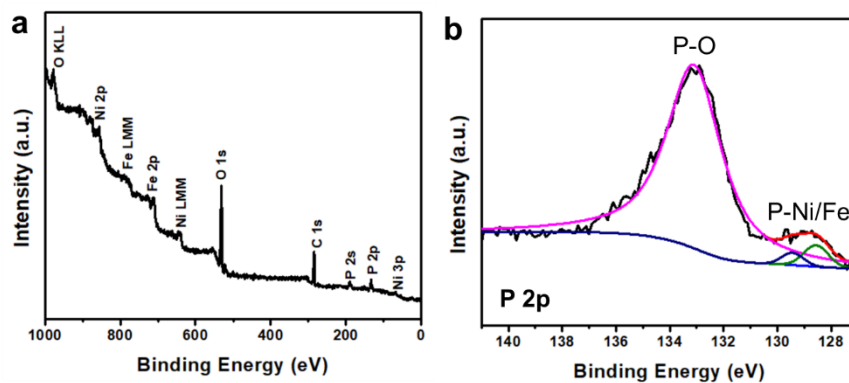

Figure S6. (a) XPS survey spectrum and (b) P 2p spectrum of NiFeP.

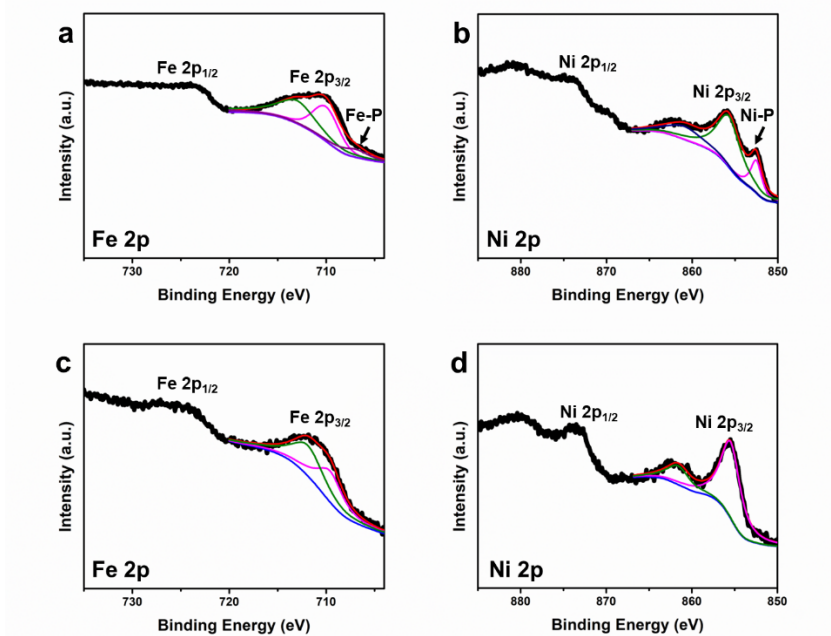

Figure S7. Fe and Ni 2p spectra of NiFeP (a, b) before and (c, d) after fuel cell process.

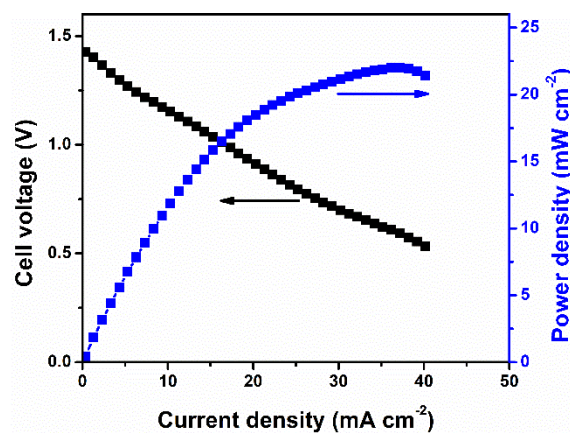

Figure S8. Polarization and power curves of the fuel cell using NiFeP on carbon cloth as the anode catalyst.



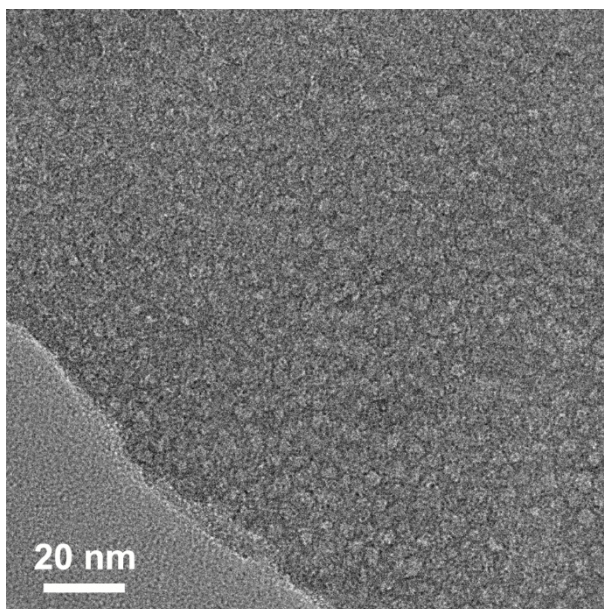

Figure S9. TEM image of NiFeP nanosheets showing abundant mesopores on the nanosheet surface.

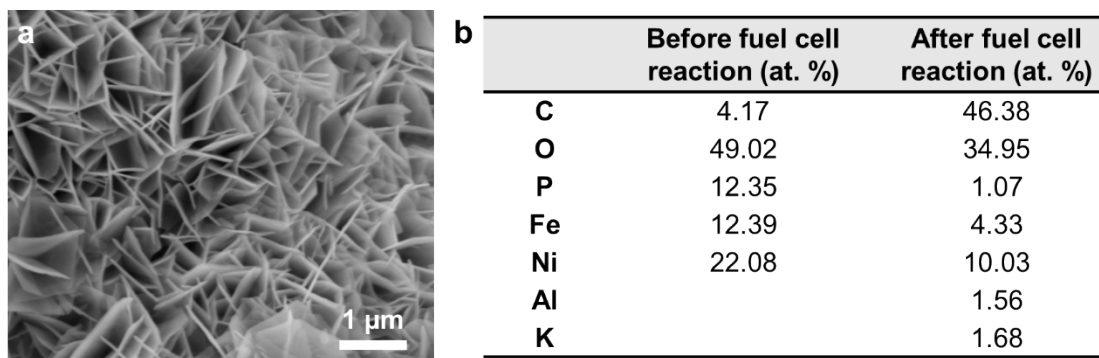

Figure S10. (a) SEM image of NiFeP nanosheets after fuel cell process. (b) Elemental composition of NiFeP nanosheets before and after fuel cell process determined by EDS.

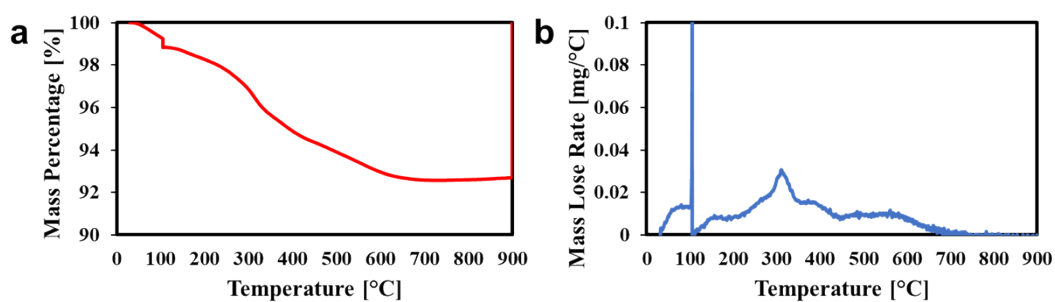

Figure S11. (a) TGA and (b) DTG analyses of NiFeP nanosheets after fuel cell process.



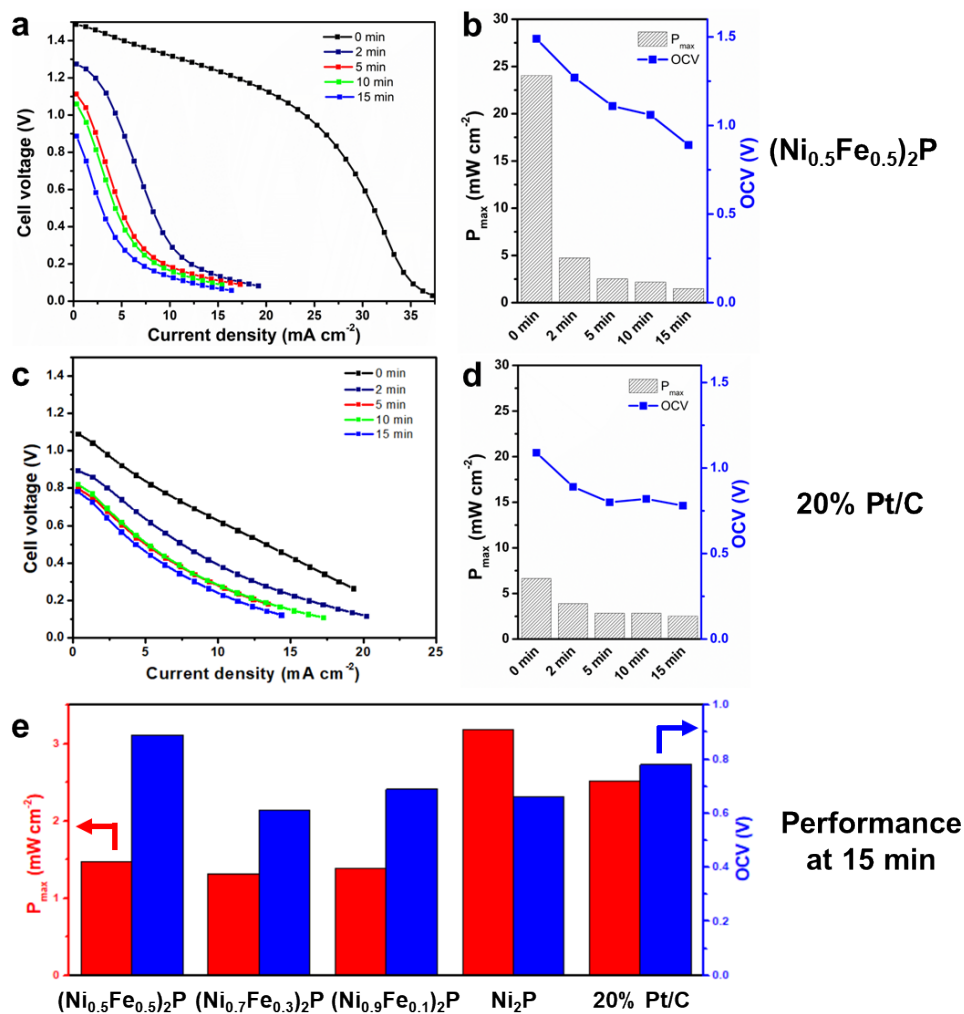

Figure S12. (a) Polarization curve, (b)  $P_{\max}$  and OCV of the fuel cell as a function of operation time using  $(\text{Ni}_{0.5}\text{Fe}_{0.5})_2\text{P}$  as the anode catalyst. (c) Polarization curve, (d)  $P_{\max}$  and OCV of the fuel cell as a function of operation time using Pt/C as the anode catalyst. (e)  $P_{\max}$  and OCV of the fuel cell at the operation time of 15 min using different anode catalyst.

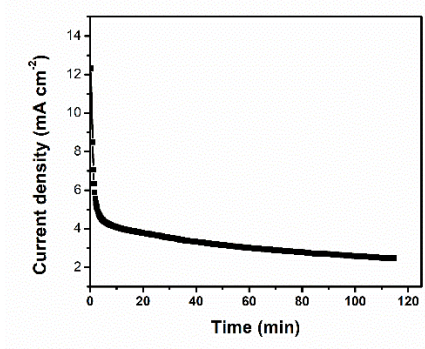

Figure S13. Constant voltage discharging at 0.2 V.

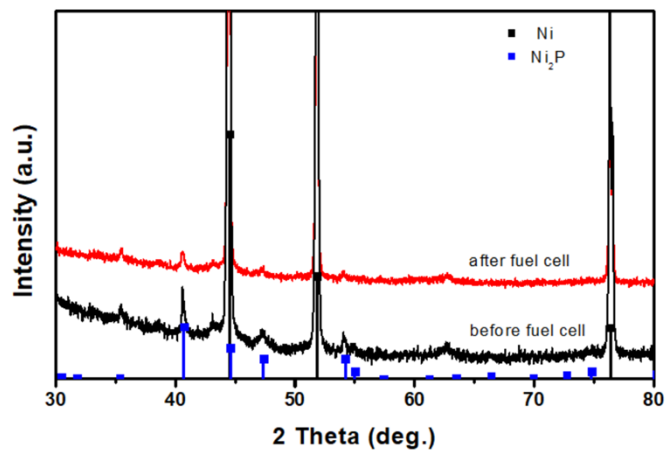

Figure S14. XRD patterns of NiFeP before and after fuel cell process.

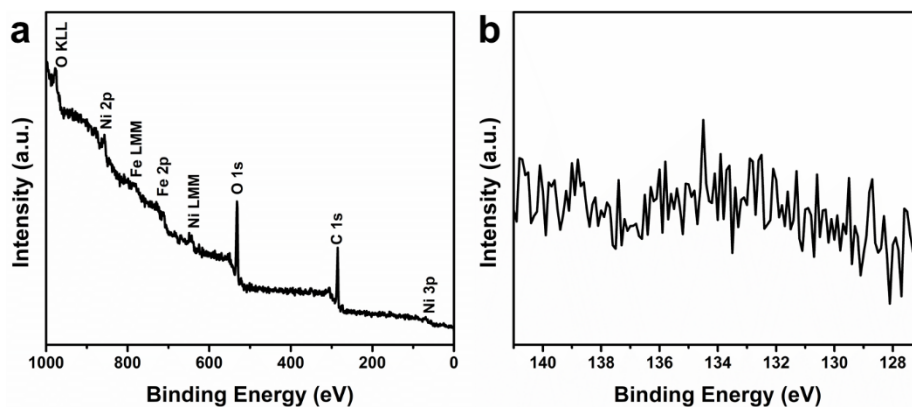

Figure S15. (a) XPS survey spectrum and (b) P 2p spectrum of NiFeP after fuel cell process.

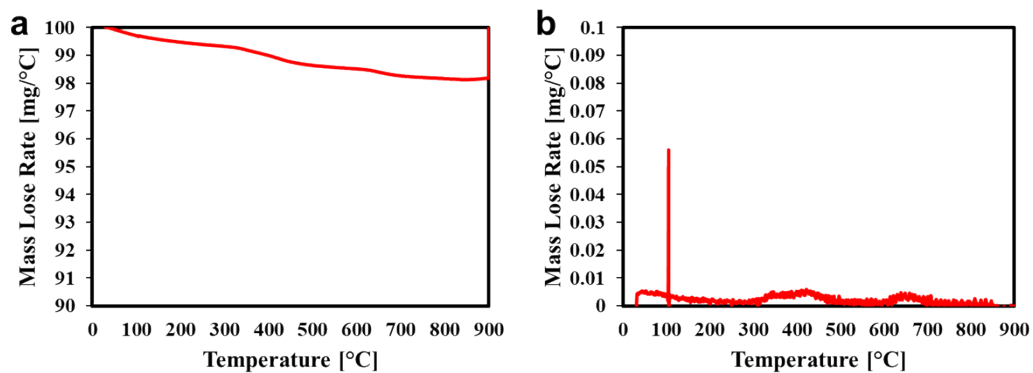

Figure S16. (a) TGA and (b) DTG analyses of the catalyst after reactivation.

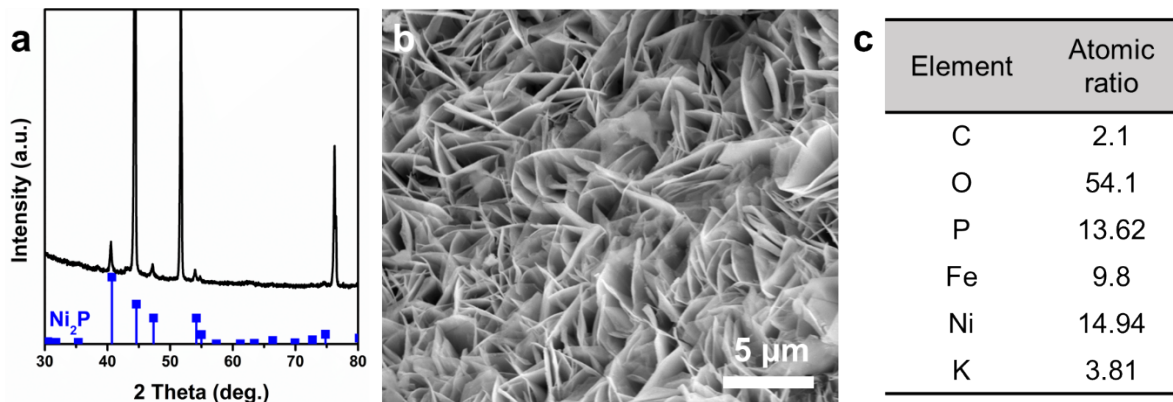

Figure S17. (a) XRD pattern, (b) SEM image and (c) EDS elemental composition of the catalyst after reactivation.

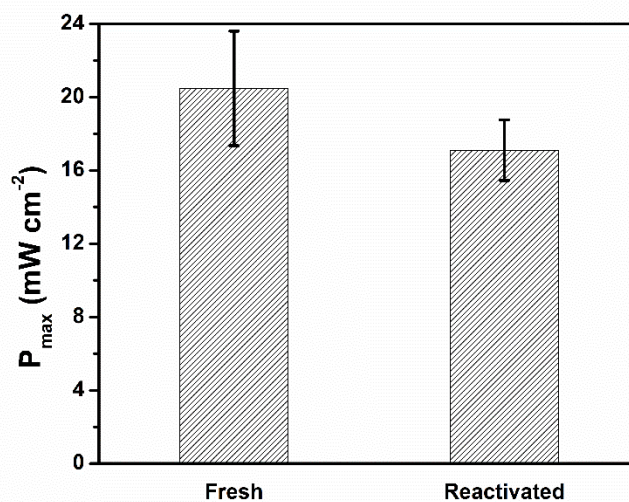

Figure S18. Maximum power density of the fuel cell using fresh and reactivated NiFeP catalyst. Error bars indicate the standard deviations of three replicates.

#### References:

- Hassan, S. H. A.; Gad El-Rab, S. M. F.; Rahimnejad, M.; Ghasemi, M.; Joo, J.-H.; Sik-Ok, Y.; Kim, I. S.; Oh, S.-E., Electricity generation from rice straw using a microbial fuel cell. *Int. J. Hydrogen Energy* **2014**, *39* (17), 9490-9496.
- Gurung, A.; Oh, S. E., Rice Straw as a Potential Biomass for Generation of Bioelectrical Energy Using Microbial Fuel Cells (MFCs). *Energy Sources Part A-Recovery Util. Environ. Eff.* **2015**, *37* (24), 2625-2631.

3. Wang, X.; Feng, Y.; Wang, H.; Qu, Y.; Yu, Y.; Ren, N.; Li, N.; Wang, E.; Lee, H.; Logan, B. E., Bioaugmentation for Electricity Generation from Corn Stover Biomass Using Microbial Fuel Cells. *Environ. Sci. Technol.* **2009**, *43* (15), 6088-6093.
4. Li, S.; Song, X., Study on the preparation and production factors of a direct lignocellulose biomass fuel cell. *J. Electroanal. Chem.* **2018**, *810*, 55-61.
5. Zhao, X.; Ding, Y.; Du, B.; Zhu, J. Y.; Liu, D., Polyoxometalate-Mediated Lignin Oxidation for Efficient Enzymatic Production of Sugars and Generation of Electricity from Lignocellulosic Biomass. *Energy Technol.* **2017**, *5* (8), 1179-1185.
6. Ding, Y.; Du, B.; Zhao, X.; Zhu, J. Y.; Liu, D., Phosphomolybdic acid and ferric iron as efficient electron mediators for coupling biomass pretreatment to produce bioethanol and electricity generation from wheat straw. *Bioresour. Technol.* **2017**, *228*, 279-289.
7. Liu, W.; Gong, Y.; Tricker, A.; Wu, G.; Liu, C.; Chao, Z.-s.; Deng, Y., Fundamental Study toward Improving the Performance of a High-Moisture Biomass-Fueled Redox Flow Fuel Cell. *Ind. Eng. Chem. Res.* **2020**, *59* (10), 4817-4828.
8. Chen, Y. A.; Yang, H. S.; Ouyang, D. H.; Liu, T. X.; Liu, D. H.; Zhao, X. B., Construction of electron transfer chains with methylene blue and ferric ions for direct conversion of lignocellulosic biomass to electricity in a wide pH range. *Appl. Catal. B-Environ.* **2020**, *265*.
9. Zhao, X. B.; Zhu, J. Y., Efficient Conversion of Lignin to Electricity Using a Novel Direct Biomass Fuel Cell Mediated by Polyoxometalates at Low Temperatures. *ChemSusChem* **2016**, *9* (2), 197-207.
10. Ouyang, D.; Wang, F.; Hong, J.; Gao, D.; Zhao, X., Ferricyanide and vanadyl (V) mediated electron transfer for converting lignin to electricity by liquid flow fuel cell with power density reaching 200 mW/cm<sup>2</sup>. *Appl. Energy* **2021**, *304*, 117927.
11. Oliveira, R. C. P.; Jeremias, M. J.; Mateus, M. M.; Santos, D. M. F., Developing a novel direct liquid fuel cell based on pulping liquors. *Fuel Cells* **2022**, *22* (1-2), 39-47.
12. Kaneko, M.; Ueno, H., Direct biomass fuel cell (BMFC) for polymeric biomass with anode/catalyst device comprising a mesoporous n-semiconductor film/Co, Ni or Cu thin layer. *Electrochim. Acta* **2013**, *90*, 682-689.
13. Faix, O. Fourier transform infrared spectroscopy. *Methods in lignin chemistry*. Springer, Berlin, Heidelberg, 1992. 83-109.
14. C. G. Boeriu, D. Bravo, R. J. A. Gosselink and J. E. G. van Dam, *Ind. Crop. Prod.*, 2004, **20**, 205-218.
15. S. Zhou, Y. Xue, A. Sharma and X. Bai, *ACS Sustainable Chemistry & Engineering*, 2016, **4**, 6608-6617.
